# Supplementary material
Source: HighWire-hosted journal article supplement (https://bmjopen.bmj.com/content/14/8/e089510)
Supplement: inline-supplementary-material-3 [file inline-supplementary-material-3.pdf]

| Supplement 3: The CHERuB study definition of any and individual neurodevelopmental impairment<br>*Denotes inclusion in the primary outcome of survival without neurosensory impairment |                                                 |                                                                                                                                                                                                                                                                                                                                                                                                                                                                                              |
|----------------------------------------------------------------------------------------------------------------------------------------------------------------------------------------|-------------------------------------------------|----------------------------------------------------------------------------------------------------------------------------------------------------------------------------------------------------------------------------------------------------------------------------------------------------------------------------------------------------------------------------------------------------------------------------------------------------------------------------------------------|
| Data source                                                                                                                                                                            | Domains/ conditions                             | Definition                                                                                                                                                                                                                                                                                                                                                                                                                                                                                   |
| NNRD                                                                                                                                                                                   | Developmental delay*                            | <input type="checkbox"/> Mild developmental delay (3-6 months)<br><input type="checkbox"/> Moderate developmental delay (6-12 months)<br><input type="checkbox"/> Severe developmental delay (>12 months)                                                                                                                                                                                                                                                                                    |
|                                                                                                                                                                                        | Communication*                                  | <input type="checkbox"/> Any difficulty with communication<br><input type="checkbox"/> Difficulty with speech (<10 words or signs)<br><input type="checkbox"/> Difficulty understanding outside of familiar context<br><input type="checkbox"/> Has <5 meaningful words, vocalisations, or signs<br><input type="checkbox"/> Unable to understand words or signs                                                                                                                             |
|                                                                                                                                                                                        | Motor*                                          | <input type="checkbox"/> Any difficulty walking<br><input type="checkbox"/> Unable to walk without assistance<br><input type="checkbox"/> Non-fluent or abnormal gait reducing mobility<br><input type="checkbox"/> Difficulty with the use of both hands<br><input type="checkbox"/> Difficulty with the use of one hand<br><input type="checkbox"/> Unable or needs support sitting<br><input type="checkbox"/> Unable to sit<br><input type="checkbox"/> Unable to use hands e.g. to feed |
|                                                                                                                                                                                        | Vision*                                         | <input type="checkbox"/> Any vision problems including squint<br><input type="checkbox"/> A not fully correctable visual defect<br><input type="checkbox"/> Complete blindness or able to see light only                                                                                                                                                                                                                                                                                     |
|                                                                                                                                                                                        | Auditory*                                       | <input type="checkbox"/> A hearing impairment<br><input type="checkbox"/> Hearing impairment correctable with aids<br><input type="checkbox"/> Hearing impairment not correctable with aids                                                                                                                                                                                                                                                                                                  |
| HES and ONS Mortality Records                                                                                                                                                          | Cognitive impairment*                           | F70-79 Intellectual impairment<br>F81.0 Specific reading disorder<br>F81.1 Specific spelling disorder<br>F81.2 Specific disorder of arithmetical skills<br>F81.3 Mixed disorder of scholastic skills<br>F81.8 Other developmental disorders of scholastic skills<br>F81.9 Developmental disorder of scholastic skills, unspecified<br>R48.0 Dyslexia and alexia<br>R 48.1 Agnosia<br>R48.2 Apraxia<br><br>R48.8 Other and unspecified symbolic dysfunctions                                  |
|                                                                                                                                                                                        | Developmental disorders of speech and language* | F80.0 Specific speech articulation disorder<br>F80.1 Expressive language disorder<br>F80.2 Receptive language disorder<br>F80.3 Acquired aphasia with epilepsy [Landau-Kleffner]                                                                                                                                                                                                                                                                                                             |

|  |                                                                              |                                                                                                                                                                                                                                                                                                                                                                                                                                                                                                                                                                      |
|--|------------------------------------------------------------------------------|----------------------------------------------------------------------------------------------------------------------------------------------------------------------------------------------------------------------------------------------------------------------------------------------------------------------------------------------------------------------------------------------------------------------------------------------------------------------------------------------------------------------------------------------------------------------|
|  |                                                                              | F80.9 Developmental disorder of speech and language, unspecified<br>R47.0 Dysphasia and aphasia<br>R47.1 Dysarthria and anarthria<br>R47.8 Other and unspecified speech disturbances                                                                                                                                                                                                                                                                                                                                                                                 |
|  | Specific developmental disorder of motor function/ dystonia/ cerebral palsy* | F82 Specific developmental disorder of motor function<br>G24.9 Dystonia, unspecified<br>G80 Cerebral palsy<br>G81 Hemiplegia<br>G82 Paraplegia and tetraplegia<br>G83.0 Diplegia of upper limbs<br>G83.1 Monoplegia of lower limb<br>G83.2 Monoplegia of upper limb<br>G83.4 Cauda equina syndrome<br>G83.5 Locked in syndrome<br>G83.6 Upper motor neuron facial paralysis<br>R26.0 Ataxic gait<br>R26.1 Paralytic gait<br>R27.0 Ataxia unspecified<br>R27.8 Other and unspecified lack of coordination<br>G 25.9 Extrapyramidal and movement disorder, unspecified |
|  | Mixed developmental disorders                                                | F83 Mixed specific developmental disorders                                                                                                                                                                                                                                                                                                                                                                                                                                                                                                                           |
|  | Developmental delay                                                          | R62.0 Delayed milestone*                                                                                                                                                                                                                                                                                                                                                                                                                                                                                                                                             |
|  | Pervasive developmental disorders                                            | F84.0 Childhood autism<br>F84.1 Atypical autism<br>F84.4 Overactive disorder associated with mental retardation and stereotyped movements<br>F84.5 Asperger syndrome<br>F84.8 Other pervasive developmental disorders<br>F84.9 Pervasive developmental disorder, unspecified                                                                                                                                                                                                                                                                                         |
|  | Other disorders of psychological development                                 | F88 Other disorders of psychological development<br>F89 Unspecified disorder of psychological development                                                                                                                                                                                                                                                                                                                                                                                                                                                            |
|  | Hyperkinetic disorders                                                       | F 90.0 Disturbance of activity and attention<br>F90.1 Hyperkinetic conduct disorder<br>F90.8 Other hyperkinetic disorders<br>F90.9 Hyperkinetic disorder, unspecified                                                                                                                                                                                                                                                                                                                                                                                                |
|  | Tic disorders                                                                | F95.0 Transient tic disorder<br>F95.1 Chronic motor or vocal tic disorder<br>F95.8 Other tic disorders<br>F95.9 Tic disorder, unspecified<br>F98.4 Stereotyped movement disorders                                                                                                                                                                                                                                                                                                                                                                                    |
|  | Epilepsy                                                                     | G40.0 Localization-related (focal)(partial) idiopathic epilepsy and epileptic syndromes with seizures of localized onset<br>G40.1 Localization-related (focal)(partial) symptomatic epilepsy and epileptic syndromes with simple partial seizures                                                                                                                                                                                                                                                                                                                    |

|  |          |                                                                                                                                                                                                                                                                                                                                                                                                                                                                                                                                                                                                                                                                                                                                                                                                                                                                                                                                                                                                                                              |
|--|----------|----------------------------------------------------------------------------------------------------------------------------------------------------------------------------------------------------------------------------------------------------------------------------------------------------------------------------------------------------------------------------------------------------------------------------------------------------------------------------------------------------------------------------------------------------------------------------------------------------------------------------------------------------------------------------------------------------------------------------------------------------------------------------------------------------------------------------------------------------------------------------------------------------------------------------------------------------------------------------------------------------------------------------------------------|
|  |          | <p>G40.2 Localization-related (focal)(partial) symptomatic epilepsy and epileptic syndromes with complex partial seizures</p> <p>G40.3 Generalized idiopathic epilepsy and epileptic syndromes</p> <p>G40.4 Other generalized epilepsy and epileptic syndromes</p> <p>G40.6 Grand mal seizures, unspecified (with or without petit mal)</p> <p>G40.7 Petit mal, unspecified, without grand mal seizures</p> <p>G40.8 Other epilepsy</p> <p>G40.9 Epilepsy, unspecified</p> <p>G41 Status epilepticus</p>                                                                                                                                                                                                                                                                                                                                                                                                                                                                                                                                     |
|  | Vision*  | <p>H47.6 Disorders of visual cortex</p> <p>H51.0 Palsy of conjugate gaze</p> <p>H51.1 Convergence insufficiency and excess</p> <p>H51.2 Internuclear ophthalmoplegia</p> <p>H51.8 Other specified disorders of binocular movement</p> <p>H51.9 Disorder of binocular movement, unspecified</p> <p>H52.0 Hypermetropia</p> <p>H52.1 Myopia</p> <p>H52.2 Astigmatism</p> <p>H52.3 Anisometropia and aniseikonia</p> <p>H52.4 Presbyopia</p> <p>H52.5 Disorders of accommodation</p> <p>H52.6 Other disorders of refraction</p> <p>H52.7 Disorder of refraction, unspecified</p> <p>H 53.0 Amblyopia ex anopsia</p> <p>H53.4 Visual field defects</p> <p>H55 Nystagmus and other irregular eye movements</p> <p>H54.0 Blindness, binocular</p> <p>H54.1 Severe visual impairment, binocular</p> <p>H54.2 Moderate visual impairment, binocular</p> <p>H54.4 Blindness, monocular</p> <p>H54.5 Severe visual impairment, monocular</p> <p>H54.6 Moderate visual impairment, monocular</p> <p>H54.9 Unspecified visual impairment (binocular)</p> |
|  | Hearing* | <p>H90.3 Sensorineural hearing loss, bilateral</p> <p>H90.4 Sensorineural hearing loss, unilateral with unrestricted hearing on the contralateral side</p> <p>H90.5 Sensorineural hearing loss, unspecified</p> <p>H90.6 Mixed conductive and sensorineural hearing loss, bilateral</p> <p>H90.7 Mixed conductive and sensorineural hearing loss, unilateral with unrestricted hearing on the contralateral side</p> <p>H90.8 Mixed conductive and sensorineural hearing loss, unspecified</p>                                                                                                                                                                                                                                                                                                                                                                                                                                                                                                                                               |

|                         |                           |                                                                                                                                                                                                                                                                                                                                                                                                                                                                                                                                                                                                                                                                                                                                                                                                                                                                                                                                                                                                                                  |
|-------------------------|---------------------------|----------------------------------------------------------------------------------------------------------------------------------------------------------------------------------------------------------------------------------------------------------------------------------------------------------------------------------------------------------------------------------------------------------------------------------------------------------------------------------------------------------------------------------------------------------------------------------------------------------------------------------------------------------------------------------------------------------------------------------------------------------------------------------------------------------------------------------------------------------------------------------------------------------------------------------------------------------------------------------------------------------------------------------|
|                         |                           | D24 Operations on cochlea<br>D24.1 Implantation of intracochlear prosthesis<br>D24.2 Implantation of extracochlear prosthesis<br>D24.3 Attention to cochlear prosthesis<br>D24.4 Neurectomy of cochlea<br>D24.6 Removal of cochlear prosthesis<br>D24.8 Other specified operations on cochlea<br>D24.9 Unspecified operations on cochlea<br>D13 Attachment of Bone Anchored Hearing Prosthesis<br>D16 Reconstruction of Ossicular Chain<br>D05 Attachment of auricular prosthesis<br>Z453 Adjustment and management of implanted hearing device<br>Z461 Fitting and adjustment of hearing aid<br>Z962 Presence of otological and audiological implants<br>Z974 Presence of external hearing-aid                                                                                                                                                                                                                                                                                                                                  |
| National Pupil Database | Academic attainment       | Did not achieve expected level or the presence of a SEN that precluded assessment at:<br>Early Years Foundation Stage*<br>Phonics assessment<br>Key Stage 1 national assessment*<br>Key Stage 2 national assessment*                                                                                                                                                                                                                                                                                                                                                                                                                                                                                                                                                                                                                                                                                                                                                                                                             |
|                         | Special educational needs | Presence of EHCP or statement of SEN<br>Attends specialist school<br><br>Indication of type of need for SEN provision (primary or secondary) irrespective of level of SEN provision (SEN support or EHCP)<br><br><input type="checkbox"/> Specific Learning Difficulty*<br><input type="checkbox"/> Moderate Learning Difficulty*<br><input type="checkbox"/> Severe Learning Difficulty*<br><input type="checkbox"/> Profound & Multiple Learning Difficulty*<br><input type="checkbox"/> Behaviour, Emotional & Social Difficulties (up to 2013/14)<br><input type="checkbox"/> Social, emotional, and mental health (from 2014/15)<br><input type="checkbox"/> Speech, Language and Communication Needs*<br><input type="checkbox"/> Hearing Impairment*<br><input type="checkbox"/> Visual Impairment*<br><input type="checkbox"/> Multi-Sensory Impairment*<br><input type="checkbox"/> Physical Disability*<br><input type="checkbox"/> Autistic Spectrum Disorder<br><input type="checkbox"/> Other Difficulty/Disability |
