# Supplementary material
Source: HighWire-hosted journal article supplement (https://bmjopen.bmj.com/content/14/8/e089510)
Supplement: inline-supplementary-material-4 [file inline-supplementary-material-4.pdf]

| Supplement 4: The CHERuB study definition of mental health and behavioural conditions |                                     |                                                                                                                                                                                                                                                                                                                                                                                                                |
|---------------------------------------------------------------------------------------|-------------------------------------|----------------------------------------------------------------------------------------------------------------------------------------------------------------------------------------------------------------------------------------------------------------------------------------------------------------------------------------------------------------------------------------------------------------|
| HES                                                                                   | Behavioural and emotional disorders | F90 Hyperkinetic disorders<br><br>F91 Conduct disorders<br><br>F92 Mixed disorders of conduct and emotions<br><br>F93 Emotional disorders with onset specific to childhood<br><br>F94 Disorders of social functioning with onset specific to childhood and adolescence<br><br>F95 Tic disorders<br><br>F98 Other behavioural and emotional disorders with onset usually occurring in childhood and adolescence |
|                                                                                       | Pervasive disorders (Autisms)       | F84.0 Childhood autism<br><br>F84.1 Atypical autism<br><br>F 84.3 Other childhood disintegrative disorder<br><br>F84.4 Overactive disorder associated with mental retardation and stereotyped movements<br><br>F84.5 Asperger syndrome<br><br>F84.8 Other pervasive developmental disorders<br><br>F84.9 Pervasive developmental disorder, unspecified                                                         |
|                                                                                       | Mood disorders                      | F30 Manic episode<br><br>F31 Bipolar affective disorder<br><br>F32 Depressive episode<br><br>F33 Recurrent depressive disorder<br><br>F34 Persistent mood [affective] disorders<br><br>F38 Other mood [affective] disorders                                                                                                                                                                                    |

|     |                                                                                                                             |                                                                                                                                                                                                                                                                                            |
|-----|-----------------------------------------------------------------------------------------------------------------------------|--------------------------------------------------------------------------------------------------------------------------------------------------------------------------------------------------------------------------------------------------------------------------------------------|
|     |                                                                                                                             | F39 Unspecified mood [affective] disorder                                                                                                                                                                                                                                                  |
|     | Anxiety disorders                                                                                                           | F40 Phobic anxiety disorders<br><br>F41 Other anxiety disorders<br><br>F42 Obsessive-compulsive disorder<br><br>F43 Reaction to severe stress, and adjustment disorders<br><br>F44 Dissociative [conversion] disorders<br><br>F45 Somatoform disorders<br><br>F48 Other neurotic disorders |
| NPD | Indication of type of need for special educational need provision (primary or secondary) irrespective of level of provision | Behaviour, emotional & social difficulties (up to 2013/14)                                                                                                                                                                                                                                 |
|     |                                                                                                                             | Social, emotional, and mental health (from 2014/15)                                                                                                                                                                                                                                        |
|     |                                                                                                                             | Autistic spectrum disorder                                                                                                                                                                                                                                                                 |
